# Supplementary material
Source: Springer Nature journal article supplement (https://www.springermedizin.de/resource/supplementary/12958_2010_713_MOESM7_ESM.pdf/9568656)

A

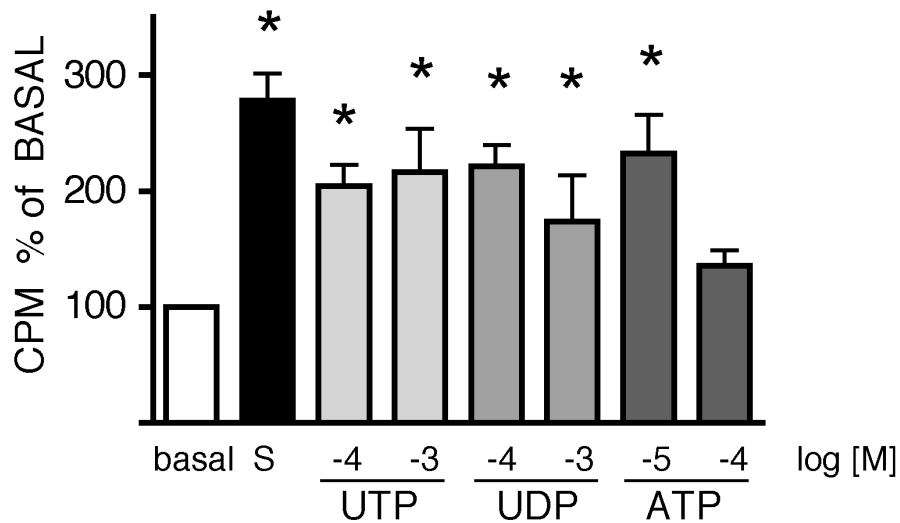

B

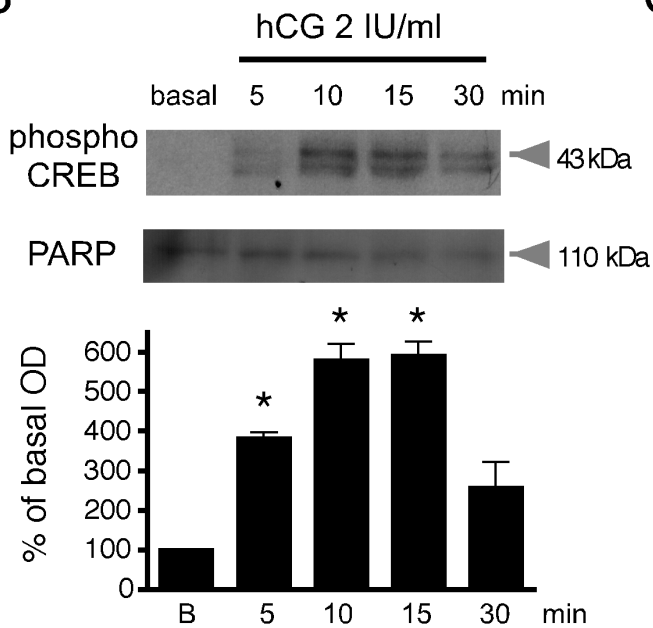

C

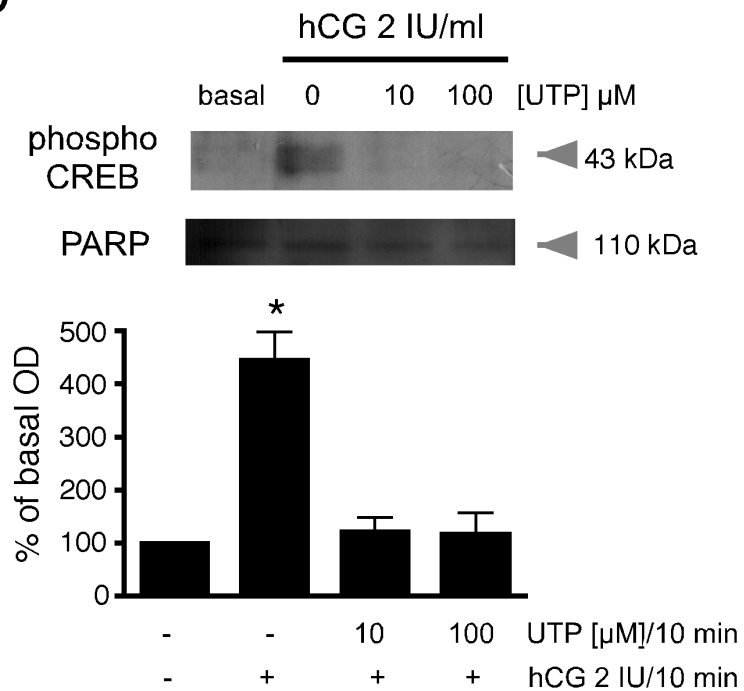

Figure 7

Supplement: MOESM7 [file 9568656]
